# Supplementary material for: Epidemiology of Blunt Head Trauma in Children in U.S. Emergency Departments
Source: Atypon-hosted journal article supplement (doi:10.1056/nejmc1407902), 2014-11-12

## Supplementary Appendix

This appendix has been provided by the authors to give readers additional information about their work.

Supplement to: Quayle KS, Holmes JF, Kuppermann N. Epidemiology of blunt head trauma in children in U.S. emergency departments. *N Engl J Med* 2014;371:1945-7. DOI: 10.1056/NEJMc1407902

## Supplemental Appendices

### Table of Contents

|                                                                                 |         |
|---------------------------------------------------------------------------------|---------|
| Complete Author List, Affiliations, Contributions, Funding and Acknowledgements | Page 2  |
| Supplemental Table 1: Sex/Race/Ethnicity of Children with Head Trauma           | Page 5  |
| Supplemental Table 2: Top 3 Injury Mechanisms by Age Group                      | Page 6  |
| Supplemental Table 3: Intracranial Findings on CT by Age                        | Page 7  |
| Supplemental Table 4: Intracranial Findings on CT by GCS Score                  | Page 8  |
| Supplemental Table 5: Neurosurgical Procedure by Age                            | Page 9  |
| Supplemental Table 6: Neurosurgical Procedure by GCS Score                      | Page 10 |
| Supplemental Figure 1: Age Distribution of Enrolled Patients                    | Page 11 |
| Supplemental Figure 2: Age Distribution of Patients with TBIs on CT             | Page 12 |
| Supplemental Figure 3: Prevalence of TBIs on CT Stratified by GCS Score         | Page 13 |
| Supplemental Figure 4: Prevalence of TBIs on CT Stratified by Age               | Page 14 |

## **Complete Author List, Affiliations, Contributions, Funding and Acknowledgements**

Kimberly S. Quayle, MD<sup>1</sup>

Elizabeth C. Powell, MD, MPH<sup>2</sup>

Prashant Mahajan, MD, MPH, MBA<sup>3</sup>

John D. Hoyle, Jr., MD<sup>4</sup>

Frances M. Nadel, MD, MSCE<sup>5</sup>

Mohamed K. Badawy, MD<sup>6</sup>

Jeff E. Schunk, MD<sup>7</sup>

Rachel M. Stanley, MD<sup>8</sup>

Michelle Miskin, MS<sup>9</sup>

Shireen M. Atabaki, MD, MPH<sup>10</sup>

Peter S. Dayan, MD, MSc<sup>11</sup>

James F. Holmes, MD, MPH<sup>12</sup>

Nathan Kuppermann, MD, MPH<sup>12, 13</sup>

### **AFFILIATIONS**

<sup>1</sup>KQ Department of Pediatrics, Washington University School of Medicine, St. Louis, MO

<sup>2</sup>EP Department of Pediatrics, Northwestern University Feinberg School of Medicine, Chicago, IL

<sup>3</sup>PM Department of Pediatrics, Wayne State University School of Medicine, Detroit, MI

<sup>4</sup>JH Department of Emergency Medicine, Michigan State University School of Medicine, Grand Rapids, MI; Departments of Emergency Medicine and Pediatrics, Western Michigan University

Homer Stryker School of Medicine, Kalamazoo, MI

<sup>5</sup>FN Department of Pediatrics, University of Pennsylvania School of Medicine, Philadelphia, PA

<sup>6</sup>MB Departments of Emergency Medicine and Pediatrics, University of Rochester School of Medicine and Dentistry, Rochester, NY

<sup>7</sup>JS Department of Pediatrics, University of Utah, Salt Lake City, UT

<sup>8</sup>RS Department of Emergency Medicine, University of Michigan School of Medicine, Ann Arbor, MI

<sup>9</sup>MM Department of Pediatrics, University of Utah, Salt Lake City, UT

<sup>10</sup>SA Department of Pediatrics and Emergency Medicine, George Washington University School of Medicine, Washington, DC

<sup>11</sup>PD Division of Pediatric Emergency Medicine, Columbia University College of Physicians and Surgeons, New York City, NY

<sup>12</sup>JH,NK Department of Emergency Medicine, University of California, Davis School of Medicine, Davis, CA

<sup>13</sup>NK Department of Pediatrics, University of California, Davis School of Medicine, Davis, CA

**Author Contributions:** Drs. Quayle and Kuppermann conceived of the study. Dr. Kuppermann obtained grant funding for the study. Ms. Miskin and Drs. Kuppermann and Quayle conducted the data analysis. Ms. Miskin and Drs. Quayle, Kuppermann, and Holmes interpreted the data. Dr. Quayle drafted the manuscript, and all authors critically revised the manuscript.

**Funding:** This work was supported by a grant from the Health Resources and Services Administration/Maternal and Child Health Bureau (HRSA/MCHB), Division of Research, Training and Education (DRTE) and the Emergency Medical Services of Children (EMSC) Program

(R40MC02461). This work was also supported by the HRSA/MCHB/EMSC Program through the following cooperative agreements: U03MC00001, U03MC00003, U03MC00006, U03MC00007, U03MC00008, U03MC22684, and U03MC22685.

**Conflicts of Interest:** The authors have no conflicts of interest to disclose.

**Acknowledgments:**

Participating centers and site investigators are listed below in alphabetical order: Atlantic Health System/Morristown Memorial Hospital (M. Gerardi); Bellevue Hospital Center (M. Tunik, J. Tsung); Calvert Memorial Hospital (K. Melville); Children's Hospital Boston (L. Lee); Children's Hospital of Michigan (P. Mahajan); Children's Hospital of New York – Presbyterian (P. Dayan); Children's Hospital of Philadelphia (F. Nadel); Children's Memorial Hospital (E. Powell); Children's National Medical Center (S. Atabaki, K. Brown); Cincinnati Children's Hospital Medical Center (T. Glass); DeVos Children's Hospital (J. Hoyle); Harlem Hospital Center (A. Cooper); Holy Cross Hospital (E. Jacobs); Howard County Medical Center (D. Monroe); Hurley Medical Center (D. Borgialli); Medical College of Wisconsin/Children's Hospital of Wisconsin (M. Gorelick, S. Bandyopadhyay); St. Barnabas Health Care System (M. Bachman, N. Schamban); SUNY-Upstate Medical Center (J. Callahan); University of California Davis Medical Center (N. Kuppermann, J. Holmes); University of Maryland (R. Lichenstein); University of Michigan (R. Stanley); University of Rochester (M. Badawy, L. Babcock-Cimpello); University of Utah/Primary Children's Medical Center (J. Schunk); Washington University/St. Louis Children's Hospital (K. Quayle, D. Jaffe); Women and Children's Hospital of Buffalo (K. Lillis).

Supplemental Table 1

|                                                        |
|--------------------------------------------------------|
| <b>Sex/Race/Ethnicity of Children with Head Trauma</b> |
|--------------------------------------------------------|

|                       | TBI on CT* | No TBI on CT | No CT        | Overall      |
|-----------------------|------------|--------------|--------------|--------------|
|                       | N = 1,157  | N = 14,751   | N = 27,491   | N = 43,399   |
| <b>Sex</b>            |            |              |              |              |
| Male                  | 738 (64%)  | 9,323 (63%)  | 16,994 (62%) | 27,055 (62%) |
| Female                | 419 (36%)  | 5,427 (37%)  | 10,495 (38%) | 16,341 (38%) |
| <b>Race/ethnicity</b> |            |              |              |              |
| Caucasian             | 657 (57%)  | 7,825 (53%)  | 11,103 (40%) | 19,585 (45%) |
| African-American      | 260 (22%)  | 4,211 (29%)  | 11,259 (41%) | 15,730 (36%) |
| Hispanic              | 112 (10%)  | 1,647 (11%)  | 3,517 (13%)  | 5,276 (12%)  |
| Asian                 | 30 (3%)    | 312 (2%)     | 549 (2%)     | 891 (2%)     |
| Other                 | 13 (1%)    | 176 (1%)     | 283 (1%)     | 472 (1%)     |
| Unknown               | 85 (7%)    | 580 (4%)     | 780 (3%)     | 1,445 (3%)   |

Note: Some percentages in the table do not add to 100% because of rounding and missing data.

Supplemental Table 2

|                                             |
|---------------------------------------------|
| <b>Top 3 Injury Mechanisms by Age Group</b> |
|---------------------------------------------|

|                                              | Frequency (%) |
|----------------------------------------------|---------------|
| <b>Children &lt; 2 years of age</b>          |               |
| Fall from elevation                          | 5,887 (54%)   |
| Fall down stairs                             | 1,533 (14%)   |
| Fall to ground from standing/walking/running | 979 (9%)      |
| <b>Children 2 - 12 years of age</b>          |               |
| Fall from elevation                          | 5,653 (24%)   |
| Fall to ground from standing/walking/running | 3,189 (14%)   |
| Object struck head - accidental              | 2,181 (9%)    |
| <b>Children 13 - 17 years of age</b>         |               |
| Assault                                      | 2,186 (24%)   |
| Sports                                       | 1,751 (19%)   |
| Occupant in motor vehicle crash              | 1,659 (18%)   |

Supplemental Table 3

|                                           |
|-------------------------------------------|
| <b>Intracranial Findings on CT by Age</b> |
|-------------------------------------------|

|                                               | < 2 years | 2 - 12 years | 13 -17 years | Overall    |
|-----------------------------------------------|-----------|--------------|--------------|------------|
|                                               | N = 335   | N = 536      | N = 286      | N = 1,157* |
| Subdural hematoma                             | 106 (32%) | 140 (26%)    | 80 (28%)     | 326 (28%)  |
| Subarachnoid hemorrhage                       | 84 (25%)  | 122 (23%)    | 77 (27%)     | 283 (24%)  |
| Cerebral contusion                            | 40 (12%)  | 127 (24%)    | 87 (30%)     | 254 (22%)  |
| Pneumocephalus                                | 26 (8%)   | 148 (28%)    | 70 (24%)     | 244 (21%)  |
| Cerebral hemorrhage/intracerebral<br>Hematoma | 47 (14%)  | 106 (20%)    | 77 (27%)     | 230 (20%)  |
| Extra-axial hematoma                          | 71 (21%)  | 92 (17%)     | 28 (10%)     | 191 (17%)  |
| Cerebral edema                                | 20 (6%)   | 73 (14%)     | 50 (17%)     | 143 (12%)  |
| Epidural hematoma                             | 43 (13%)  | 65 (12%)     | 30 (10%)     | 138 (12%)  |
| Midline shift/shift of brain structures       | 33 (10%)  | 57 (11%)     | 44 (15%)     | 134 (12%)  |
| Diastasis of the skull                        | 27 (8%)   | 41 (8%)      | 12 (4%)      | 80 (7%)    |
| Intraventricular hemorrhage                   | 14 (4%)   | 24 (4%)      | 19 (7%)      | 57 (5%)    |
| Shear injury                                  | 2 (1%)    | 12 (2%)      | 11 (4%)      | 25 (2%)    |
| Cerebellar hemorrhage                         | 5 (1%)    | 10 (2%)      | 8 (3%)       | 23 (2%)    |
| Diffuse axonal Injury                         | 0 (0%)    | 7 (1%)       | 9 (3%)       | 16 (1%)    |
| Herniation                                    | 1 (0%)    | 7 (1%)       | 4 (1%)       | 12 (1%)    |
| Traumatic infarction                          | 2 (1%)    | 3 (1%)       | 3 (1%)       | 8 (1%)     |
| Sigmoid sinus thrombosis                      | 0 (0%)    | 1 (0%)       | 0 (0%)       | 1 (0%)     |

\*556 patients had more than one TBI visualized on CT scan



Supplemental Table 4

|                                                 |
|-------------------------------------------------|
| <b>Intracranial Findings on CT by GCS Score</b> |
|-------------------------------------------------|

|                                               | GCS 3-8  | GCS 9-13 | GCS 14-15 | Overall    |
|-----------------------------------------------|----------|----------|-----------|------------|
|                                               | N = 214  | N = 160  | N = 783   | N = 1,157* |
| Subdural hematoma                             | 83 (39%) | 53 (33%) | 190 (24%) | 326 (28%)  |
| Subarachnoid hemorrhage                       | 89 (42%) | 42 (26%) | 152 (19%) | 283 (24%)  |
| Cerebral contusion                            | 68 (32%) | 34 (21%) | 152 (19%) | 254 (22%)  |
| Pneumocephalus                                | 56 (26%) | 40 (25%) | 148 (19%) | 244 (21%)  |
| Cerebral hemorrhage/intracerebral<br>Hematoma | 68 (32%) | 47 (29%) | 115 (15%) | 230 (20%)  |
| Extra-axial hematoma                          | 32 (15%) | 26 (16%) | 133 (17%) | 191 (17%)  |
| Cerebral edema                                | 86 (40%) | 20 (13%) | 37 (5%)   | 143 (12%)  |
| Epidural hematoma                             | 18 (8%)  | 21 (13%) | 99 (13%)  | 138 (12%)  |
| Midline shift/shift of brain structures       | 62 (29%) | 19 (12%) | 53 (7%)   | 134 (12%)  |
| Diastasis of the skull                        | 20 (9%)  | 15 (9%)  | 45 (6%)   | 80 (7%)    |
| Intraventricular hemorrhage                   | 32 (15%) | 8 (5%)   | 17 (2%)   | 57 (5%)    |
| Shear Injury                                  | 12 (6%)  | 3 (2%)   | 10 (1%)   | 25 (2%)    |
| Cerebellar hemorrhage                         | 10 (5%)  | 2 (1%)   | 11 (1%)   | 23 (2%)    |
| Diffuse axonal Injury                         | 13 (6%)  | 0 (0%)   | 3 (0%)    | 16 (1%)    |
| Herniation                                    | 11 (5%)  | 1 (1%)   | 0 (0%)    | 12 (1%)    |
| Traumatic infarction                          | 7 (3%)   | 0 (0%)   | 1 (0%)    | 8 (1%)     |
| Sigmoid sinus thrombosis                      | 0 (0%)   | 0 (0%)   | 1 (0%)    | 1 (0%)     |

\*556 patients had more than one TBI visualized on CT

**Supplemental Table 5****Neurosurgical Procedure by Age**

|                                  | < 2 years | 2 - 12 years | 13 - 17 years | Overall  |
|----------------------------------|-----------|--------------|---------------|----------|
|                                  | N = 35    | N = 105      | N = 60        | N = 200* |
| Hematoma drained                 | 19 (54%)  | 42 (40%)     | 24 (40%)      | 85 (43%) |
| ICP monitor                      | 9 (26%)   | 48 (46%)     | 25 (42%)      | 82 (41%) |
| Ventriculostomy                  | 6 (17%)   | 25 (24%)     | 27 (45%)      | 58 (29%) |
| Fracture elevation               | 11 (31%)  | 21 (20%)     | 10 (17%)      | 42 (21%) |
| Dura repair for CSF leak         | 1 (3%)    | 14 (13%)     | 3 (5%)        | 18 (9%)  |
| Craniectomy/bone flap            | 3 (9%)    | 4 (4%)       | 5 (8%)        | 12 (6%)  |
| Lobectomy                        | 3 (9%)    | 4 (4%)       | 1 (2%)        | 8 (4%)   |
| Tissue debridement               | 0 (0%)    | 6 (6%)       | 1 (2%)        | 7 (4%)   |
| Other neurosurgical<br>procedure | 2 (6%)    | 1 (1%)       | 2 (3%)        | 5 (3%)   |

\*85 patients had more than one neurosurgical procedure performed.

ICP = intracranial pressure monitor, CSF = cerebrospinal fluid

Other neurosurgical procedures include shunt placement, lumbar drain, fontanelle tap, suture cranial nerves and meninges repair.

Supplemental Table 6

|                                             |
|---------------------------------------------|
| <b>Neurosurgical Procedure by GCS Score</b> |
|---------------------------------------------|

|                                  | GCS 3 - 8 | GCS 9 - 13 | GCS 14 - 15 | Total      |
|----------------------------------|-----------|------------|-------------|------------|
| Number                           | 108/354   | 32/615     | 60/42,430   | 200/43,399 |
| (%)                              | (30.5%)   | (5.2%)     | (0.1%)      | (0.5%)     |
| Hematoma drained                 | 33 (31%)  | 18 (56%)   | 34 (57%)    | 85 (43%)   |
| ICP monitor                      | 69 (64%)  | 12 (38%)   | 1 (2%)      | 82 (41%)   |
| Ventriculostomy                  | 51 (47%)  | 6 (19%)    | 1 (2%)      | 58 (29%)   |
| Fracture elevation               | 6 (6%)    | 8 (25%)    | 28 (47%)    | 42 (21%)   |
| Dura repair for CSF leak         | 8 (7%)    | 4 (13%)    | 6 (10%)     | 18 (9%)    |
| Craniectomy/bone flap            | 9 (8%)    | 0 (0%)     | 3 (5%)      | 12 (6%)    |
| Lobectomy                        | 7 (6%)    | 0 (0%)     | 1 (2%)      | 8 (4%)     |
| Tissue debridement               | 2 (2%)    | 1 (3%)     | 4 (7%)      | 7 (4%)     |
| Other neurosurgical<br>procedure | 2 (2%)    | 2 (6%)     | 1 (2%)      | 5 (3%)     |

\*85 patients had more than one neurosurgical procedure performed.

ICP = intracranial pressure monitor, CSF = cerebrospinal fluid

Other neurosurgical procedures include shunt placement, lumbar drain, fontanelle tap, suture cranial nerves and meninges repair

## Supplemental Figure 1

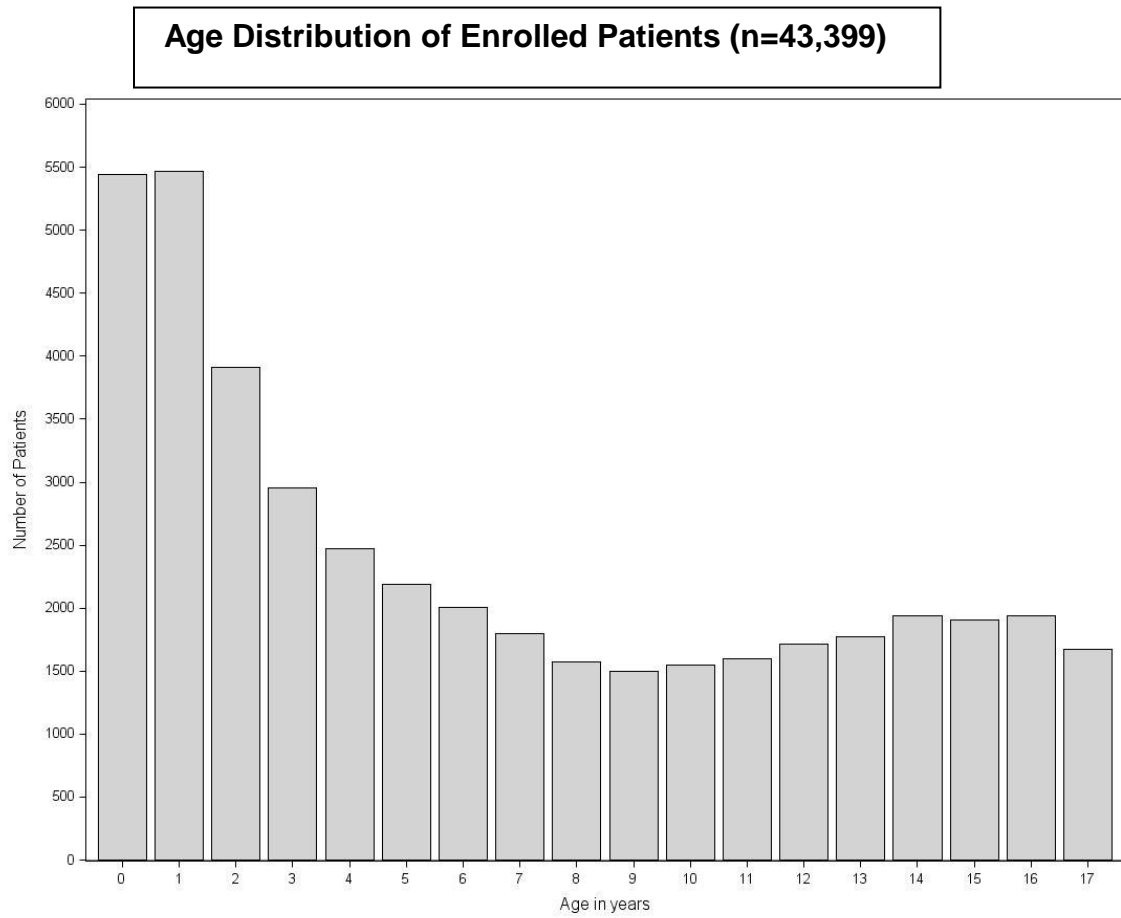

## Supplemental Figure 2

## Age Distribution of Patients with TBIs on CT

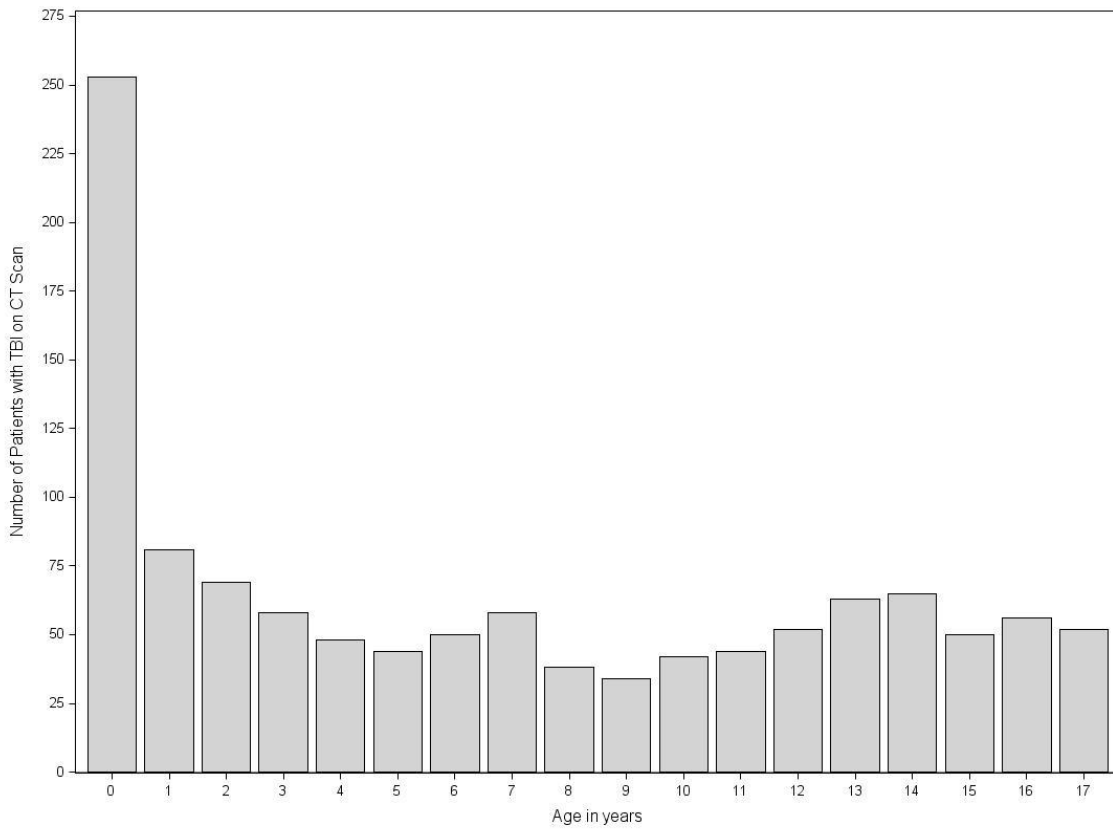

## Supplemental Figure 3

## Prevalence of TBIs on CT Stratified by Age

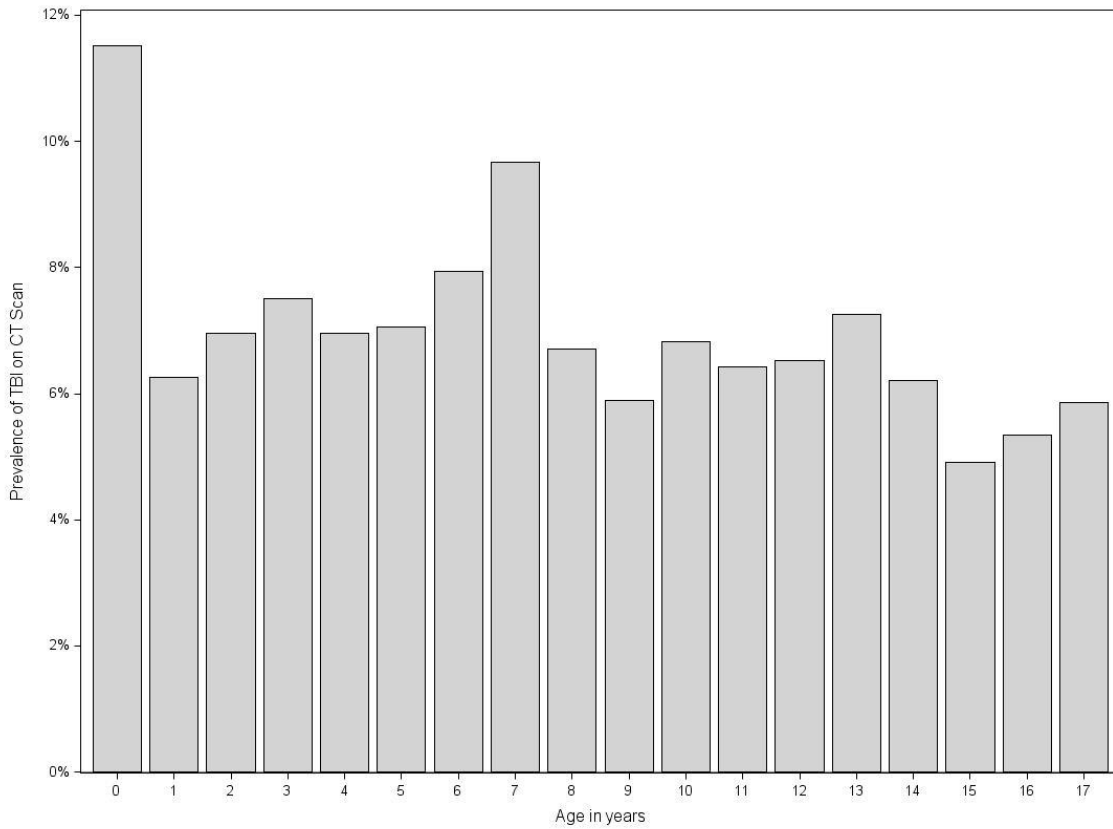

## Supplemental Figure 4

## Prevalence of TBIs on CT Stratified by GCS Score

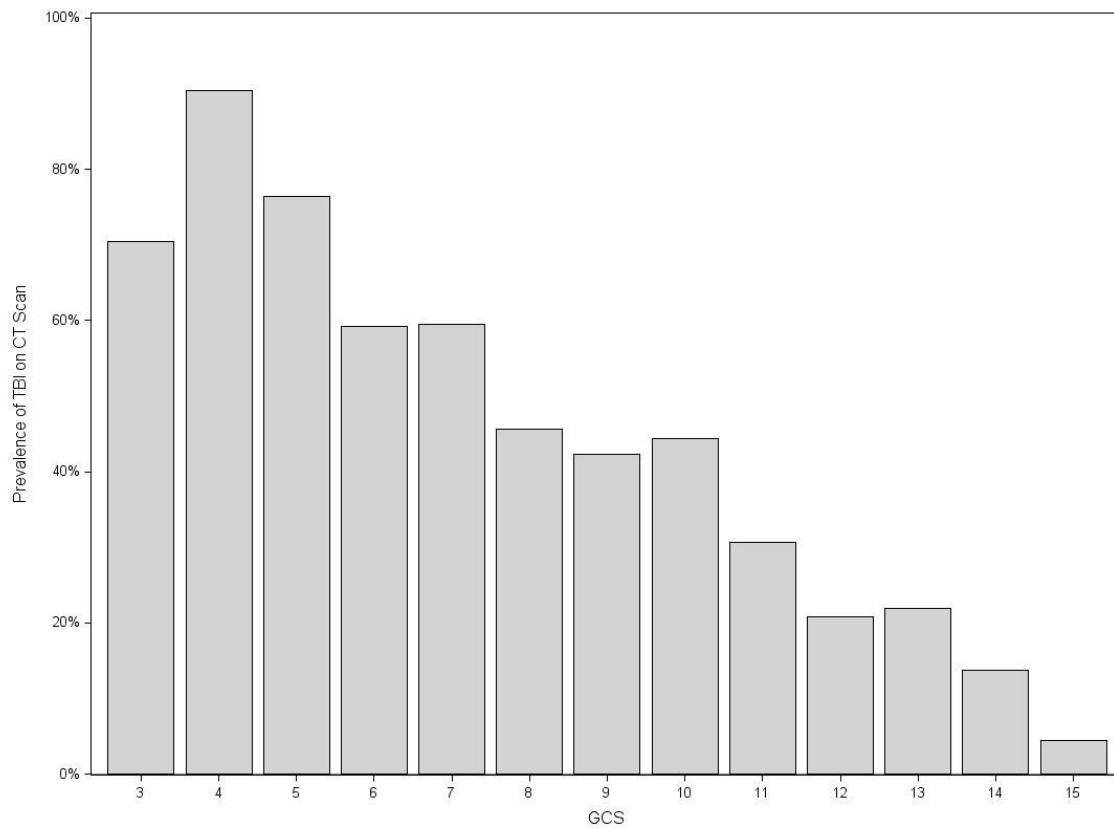

Supplement: nejmc1407902_appendix.pdf [file nejmc1407902_appendix.pdf]
